# Supplementary material
Source: PubMed Central journal article supplement (PMC7245566)
Supplement: NIHMS1569714-supplement-1.pdf [file NIHMS1569714-supplement-1.pdf]

Figure S1

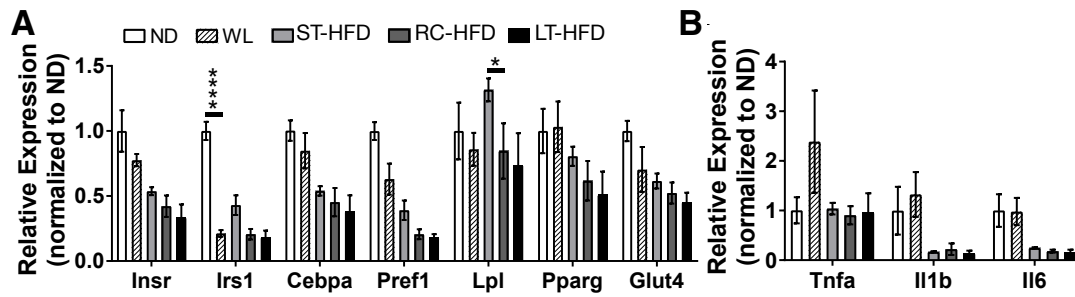

Inguinal adipose tissue gene expression. (A) Adipogenic genes. (B) Inflammatory genes. \*  $p < 0.05$ , \*\*  $p < 0.01$ , \*\*\*\*  $p < 0.0001$ , significance was only compared for ST HFD versus RC HFD, LT HFD versus RC HFD or ND versus WL.

Figure S2

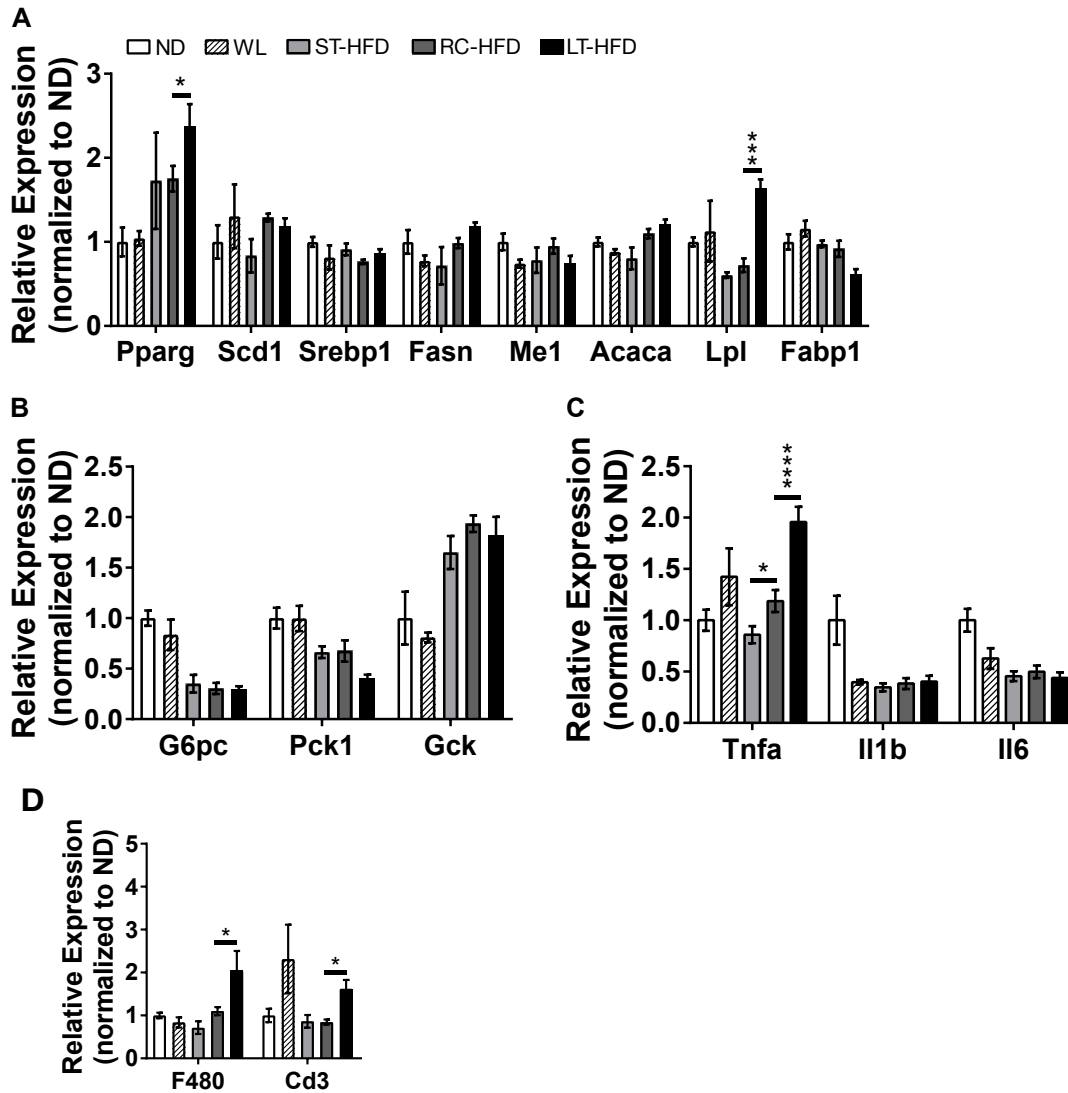

Liver lipid metabolism and lipogenesis gene expression is not significantly different between ST HFD and RC HFD mice groups. Gene expression for select liver (A) lipid metabolism, (B) glucose metabolism, (C) inflammatory cytokine genes, and (D) leukocyte genes. \*  $p < 0.05$ , \*\*\*  $p < 0.001$ , \*\*\*\*  $p < 0.0001$ , significance was only compared for ST HFD versus RC HFD, LT HFD versus RC HFD or ND versus WL.

**Figure S3**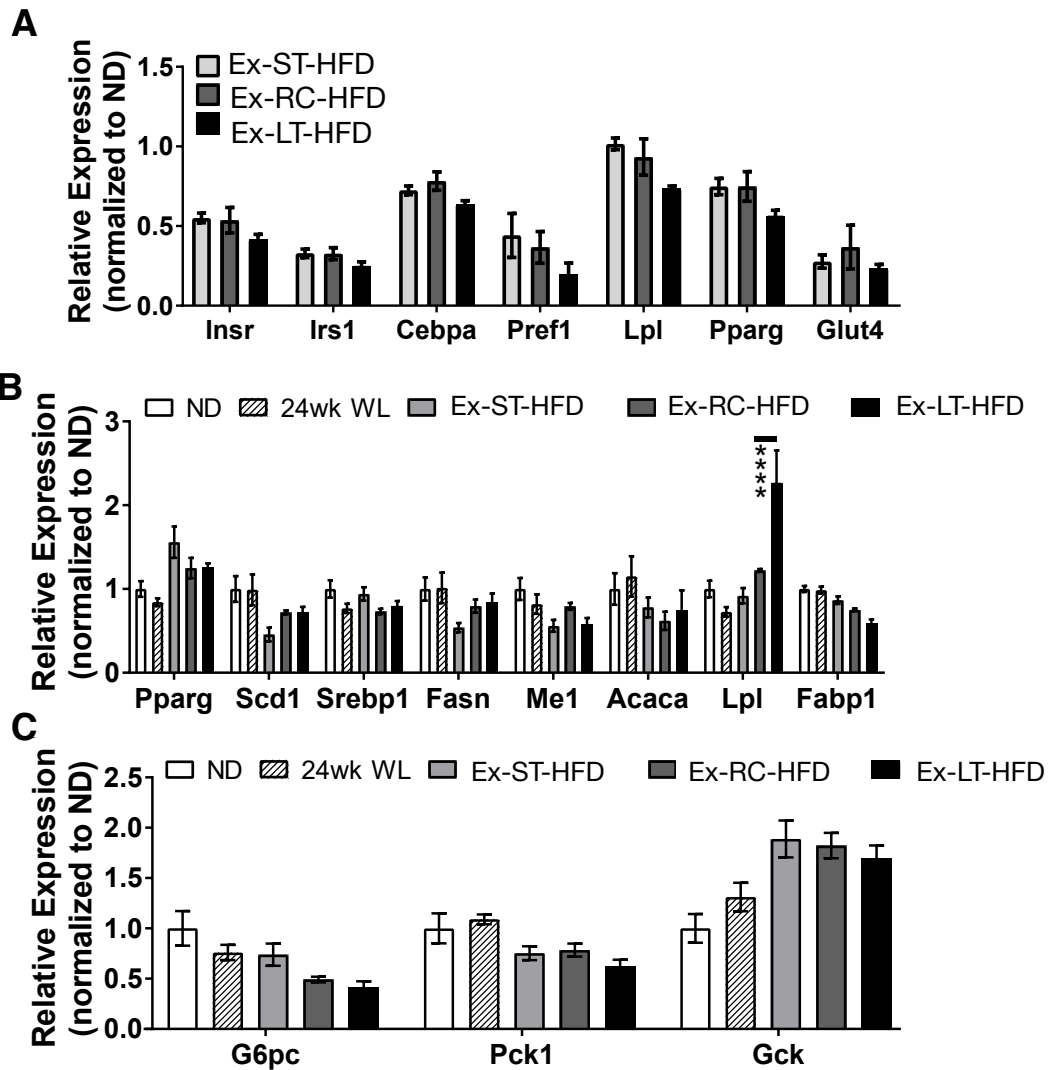

Adipose tissue and liver gene expression after rechallenge after prolonged period off diet. (A)

Expression of select adipocyte maturation genes from whole eWAT. Gene expression for select

liver (B) lipid metabolism and (C) glucose metabolism genes. \*  $p < 0.05$ , \*\*  $p < 0.01$ , \*\*\*  $p < 0.001$ ,

\*\*\*\*  $p < 0.0001$ , significance was only compared for Ex-ST-HFD versus Ex-RC-HFD, Ex-LT-HFD

versus Ex-RC-HFD, or ND versus WL.

**Table S1 - Primers for qRT-PCR analysis**

| <b>Gene</b>             | <b>Forward Primer</b>   | <b>Reverse Primer</b>   |
|-------------------------|-------------------------|-------------------------|
| <b>Insr</b>             | TTTGTCATGGATGGAGGCTA    | CCTCATCTTGGGGTTGAACT    |
| <b>Irs1</b>             | CGATGGCTTCTCAGACGTG     | CAGCCCGCTTGTTGATGTTG    |
| <b>Cebpa</b>            | CAAGAACAGCAACGAGTACCG   | GTCACTGGTCAACTCCAGCAC   |
| <b>Pref1<br/>(Dlk1)</b> | TTCGGGCTTGACCTCAA       | GGAGCATTCTGACTGGCCTTT   |
| <b>Lpl</b>              | TGTGTCTTCAGGGGTCCTTAG   | GGGAGTTTGGCTCCAGAGTTT   |
| <b>Pparg</b>            | GGAAGACCACTCGCATTCTT    | TCGCACTTTGGTATTCTTGGAG  |
| <b>Akt1</b>             | ATGAACGACGTAGCCATTGTG   | TTGTAGCCAATAAAGGTGCCAT  |
| <b>Glut4</b>            | GTGACTGGAACACTGGTCCTA   | CCAGCCACGTTGCATTGTAG    |
| <b>Tnfa</b>             | ACGGCATGGATCTCAAAGAC    | AGATAGCAAATCGGCTGACG    |
| <b>Il1b</b>             | AAATACCTGTGGCCTTGGGC    | CTTGGGATCCACACTCTCCAG   |
| <b>Il6</b>              | AGTGAGGAACAAGCCAGAGC    | CATTTGTGGTTGGGTCAGG     |
| <b>Scd1</b>             | GCTGGAGTACGTCTGGAGGAA   | TCCCGAAGAGGCAGGTGTAG    |
| <b>Srebp1</b>           | GATGTGCGAACTGGACACAG    | CATAGGGGGCGTCAAACAG     |
| <b>Fasn</b>             | GGAGGTGGTGATAGCCGGTAT   | TGGGTAATCCATAGAGCCCAG   |
| <b>Me1</b>              | GTCGTGCATCTCTCACAGAAG   | TGAGGGCAGTTGGTTTTATCTTT |
| <b>Acaca</b>            | TAATGGGCTGCTTCTGTGACTC  | CTCAATATCGCCATCAGTCTTG  |
| <b>Fabp1</b>            | ATGAACTTCTCCGGCAAGTACC  | CTGACACCCCCTTGATGTCC    |
| <b>G6pc</b>             | CGACTCGCTATCTCCAAGTGA   | GTTGAACCAGTCTCCGACCA    |
| <b>Pck1</b>             | CTGCATAACGGTCTGGACTTC   | CAGCAACTGCCCGTACTCC     |
| <b>Gck</b>              | ATGGCTGTGGATACTACAAGGA  | TTCAGGCCACGGTCCATCT     |
| <b>Fabp4</b>            | AAGGTGAAGAGCATCATAACCCT | TCACGCCTTTCATAACACATTCC |
